# Supplementary material
Source: publisher figshare collection journal article supplement (https://tandf.figshare.com/ndownloader/files/15603380)
Supplement: Supplementary file 1 [file 15603380]

Table elements without content mean that no data has been found in concerned study protocol. The term “(total)” implies, that there has been no discrimination of rheumatoid factor positive and negative rheumatoid arthritis.

**SUPPLEMENTARY MATERIAL** Supplementary Table 1: Summary of baseline patient demographic and disease characteristics

CHAQ, Children’s Health Assessment Questionnaire; CRP, C reactive protein); MTX, methotrexate; OA, oligoarticular; PA, polyarticular; RF, rheumatoid factor.

Table elements without content mean that no data has been found in concerned study protocol.

Supplementary Table 2: Summary of all adverse events in any examined clinical trial

AE, adverse event; PY, patient-years; SAE, serious adverse events.
